# Supplementary material for: GM2 Gangliosidosis in Shiba Inu Dogs with an In‐Frame Deletion in HEXB
Source: PubMed Central journal article supplement — J Vet Intern Med. 2017 Aug 20;31(5):1520–6. doi: 10.1111/jvim.14794 (PMC5598891; doi:10.1111/jvim.14794), 2017-08-20
Supplement: JVIM-31-1520-s002.pdf [file JVIM-31-1520-s002.pdf]

**Supplementary Table: Rare variants predicted to change the primary sequence of the gene product**

| Coordinate        | Gene                | Nucleotide change                                                         | Consequence |
|-------------------|---------------------|---------------------------------------------------------------------------|-------------|
| 1:924522          | <i>CTDP1</i>        | c.1990C>A                                                                 | Nonsyn SNV  |
| 1:104890731       | <i>LOC106558999</i> | c.-56+1_-56+2insT                                                         | Splicing    |
| 2:33828898        | <i>ADARB2</i>       | c.1879G>A                                                                 | Nonsyn SNV  |
| 2:42310546        | <i>SPINK5</i>       | c.293A>T                                                                  | Nonsyn SNV  |
| 2:43248005        | <i>IL6ST</i>        | c.12G>T                                                                   | Nonsyn SNV  |
| 2:48844920        | <i>IPO11</i>        | c.2096G>A                                                                 | Nonsyn SNV  |
| 2:48844931        | <i>IPO11</i>        | c.2107C>A                                                                 | Nonsyn SNV  |
| 2:52647551        | <i>CD180</i>        | c.646C>T                                                                  | Nonsyn SNV  |
| <b>2:57243653</b> | <b><i>HEXB</i></b>  | <b>c.945_947delCCT</b>                                                    | <b>Del</b>  |
| 2:58350523        | <i>CCDC113</i>      | c.913G>A                                                                  | Nonsyn SNV  |
| 2:58579428        | <i>CNGB1</i>        | c.214C>T                                                                  | Nonsyn SNV  |
| 2:58781765        | <i>ADGRG3</i>       | c.1595C>T                                                                 | Nonsyn SNV  |
| 2:65342376        | <i>LOC487290</i>    | c.203G>A                                                                  | Nonsyn SNV  |
| 2:76408401        | <i>LACTBL1</i>      | c.677C>T                                                                  | Nonsyn SNV  |
| 3:18314343        | <i>ADGRV1</i>       | c.3502C>T                                                                 | Nonsyn SNV  |
| 4:57953189        | <i>SLC36A2</i>      | c.958C>T                                                                  | Nonsyn SNV  |
| 4:59883859        | <i>SH3TC2</i>       | c.1273G>A                                                                 | Nonsyn SNV  |
| 6:8811313         | <i>MUC17</i>        | c.1294_1295insAGACGTGACCACATCATCAGTATCTCCAG<br>ATGGGACCACATCAGCAGCTGCTCCA | Stopgain    |
| 6:12571677        | <i>TNRC18</i>       | c.4857C>G                                                                 | Nonsyn SNV  |
| 6:13248516        | <i>SDK1</i>         | c.2912G>T                                                                 | Nonsyn SNV  |
| 6:15276899        | <i>ELFN1</i>        | c.1886C>T                                                                 | Nonsyn SNV  |
| 6:15413161        | <i>TMEM184A</i>     | c.166C>T                                                                  | Nonsyn SNV  |
| 6:36540441        | <i>PPL</i>          | c.4405C>T                                                                 | Nonsyn SNV  |
| 6:36661974        | <i>ZNF500</i>       | c.1361G>A                                                                 | Nonsyn SNV  |
| 6:39118587        | <i>IGFALS</i>       | c.1900G>A                                                                 | Nonsyn SNV  |
| 6:39121141        | <i>NUBP2</i>        | c.37G>A                                                                   | Nonsyn SNV  |
| 6:39478018        | <i>LOC448801</i>    | c.116C>T                                                                  | Nonsyn SNV  |
| 6:39511373        | <i>CACNA1H</i>      | c.6328G>T                                                                 | Nonsyn SNV  |
| 6:39518309        | <i>CACNA1H</i>      | c.4445G>A                                                                 | Nonsyn SNV  |
| 6:39978234        | <i>PIGQ</i>         | c.292G>T                                                                  | Nonsyn SNV  |
| 6:39984223        | <i>NHLRC4</i>       | c.1259G>A                                                                 | Nonsyn SNV  |
| 6:39984362        | <i>NHLRC4</i>       | c.1120G>A                                                                 | Nonsyn SNV  |
| 6:39984617        | <i>NHLRC4</i>       | c.865G>A                                                                  | Nonsyn SNV  |
| 6:40429609        | <i>LOC611642</i>    | c.278G>A                                                                  | Nonsyn SNV  |
| 6:40654696        | <i>LOC611675</i>    | c.993_994insCTGCCTCCATCTACCTATGTTCTTAATGTATG<br>TATACACCCAGG              | Ins         |
| 6:40823680        | <i>DENND2D</i>      | c.264G>T                                                                  | Nonsyn SNV  |
| 9:36330268        | <i>CA4</i>          | c.412A>G                                                                  | Nonsyn SNV  |
| 11:3522330        | <i>LOC474642</i>    | c.328C>T                                                                  | Stopgain    |
| 11:12337210       | <i>SNCAIP</i>       | c.997C>G                                                                  | Nonsyn SNV  |
| 14:40359259       | <i>HOXA11</i>       | c.664_665insCGG                                                           | Ins         |
| 14:43195886       | <i>NOD1</i>         | c.1534G>A                                                                 | Nonsyn SNV  |
| 15:1570206        | <i>HIVEP3</i>       | c.3269C>T                                                                 | Nonsyn SNV  |
| 15:3345340        | <i>LOC100855618</i> | c.1268C>T                                                                 | Nonsyn SNV  |
| 15:5952737        | <i>SH3D21</i>       | c.308G>A                                                                  | Nonsyn SNV  |
| 15:6922899        | <i>ZMYM1</i>        | c.319G>T                                                                  | Nonsyn SNV  |
| 15:7005024        | <i>ZMYM6</i>        | c.2847A>G                                                                 | Nonsyn SNV  |
| 15:8995338        | <i>ORC1</i>         | c.2554G>A                                                                 | Nonsyn SNV  |
| 15:15536284       | <i>BEST4</i>        | c.479C>T                                                                  | Nonsyn SNV  |
| 15:16132552       | <i>KLF18</i>        | c.1367A>T                                                                 | Nonsyn SNV  |
| 15:17495861       | <i>LOC100855686</i> | c.40C>T                                                                   | Nonsyn SNV  |
| 15:17763635       | <i>KLHL33</i>       | c.565G>C                                                                  | Nonsyn SNV  |

| Coordinate  | Gene                | Nucleotide change                 | Consequence    |
|-------------|---------------------|-----------------------------------|----------------|
| 15:18124446 | <i>TPPP2</i>        | c.479G>A                          | Nonsyn SNV     |
| 15:22772701 | <i>LOC106559776</i> | c.39_41delTGT                     | Del            |
| 15:51916068 | <i>DCHS2</i>        | c.9953C>T                         | Nonsyn SNV     |
| 16:5993505  | <i>COR13M1</i>      | c.125A>C                          | Nonsyn SNV     |
| 16:20282728 | <i>PTPRN2</i>       | c.1516G>A                         | Nonsyn SNV     |
| 18:26154975 | <i>LOC106559966</i> | c.443G>C                          | Nonsyn SNV     |
| 18:46124790 | <i>LOC102153419</i> | c.938G>A                          | Nonsyn SNV     |
| 18:53442696 | <i>LGALS12</i>      | c.407T>C                          | Nonsyn SNV     |
| 22:52246650 | <i>CCDC168</i>      | c.2524C>T                         | Nonsyn SNV     |
| 22:52356145 | <i>ERCC5</i>        | c.1658C>T                         | Nonsyn SNV     |
| 23:8212869  | <i>ACVR2B</i>       | c.431C>T                          | Nonsyn SNV     |
| 23:8790242  | <i>TTC21A</i>       | c.782A>C                          | Nonsyn SNV     |
| 23:8853006  | <i>XIRP1</i>        | c.2857C>T                         | Nonsyn SNV     |
| 24:44550537 | <i>PPP1R3D</i>      | c.683G>A                          | Nonsyn SNV     |
| 25:35432289 | <i>LOC106557768</i> | c.556delT                         | Frameshift Del |
| 25:35432291 | <i>LOC106557768</i> | c.558_559delCC                    | Stopgain       |
| 25:37253297 | <i>ZNF596</i>       | c.157A>G                          | Nonsyn SNV     |
| 27:1770147  | <i>PRR13</i>        | c.344A>T                          | Nonsyn SNV     |
| 27:2448245  | <i>KRT2</i>         | c.392G>C                          | Nonsyn SNV     |
| 27:38938186 | <i>VWF</i>          | c.6380C>T                         | Nonsyn SNV     |
| 31:29813863 | <i>C31H21orf140</i> | c.738_740delCTA                   | Del            |
| 31:38348044 | <i>LOC100685181</i> | c.241G>A                          | Nonsyn SNV     |
| 31:38355090 | <i>LOC611489</i>    | c.568_569insCACCTCCA              | Frameshift Ins |
| 33:29155279 | <i>TNK2</i>         | c.1597G>A                         | Nonsyn SNV     |
| 36:3337579  | <i>GALNT5</i>       | c.1166A>G                         | Nonsyn SNV     |
| X:1454947   | <i>XG</i>           | c.358G>A                          | Nonsyn SNV     |
| X:1459432   | <i>XG</i>           | c.399C>G                          | Nonsyn SNV     |
| X:6822143   | <i>WWC3</i>         | c.2382G>C                         | Nonsyn SNV     |
| X:77011557  | <i>TCEAL4</i>       | c.250_270delAAGCCAGCGGAGAGCGAGGGG | Del            |
